# Supplementary material for: 4-Methylumebelliferone Enhances Radiosensitizing Effects of Radioresistant Oral Squamous Cell Carcinoma Cells via Hyaluronan Synthase 3 Suppression
Source: MDPI journal article supplement (doi:10.3390/cells11233780), 2022-11-25
Supplement: s1 [file s1]

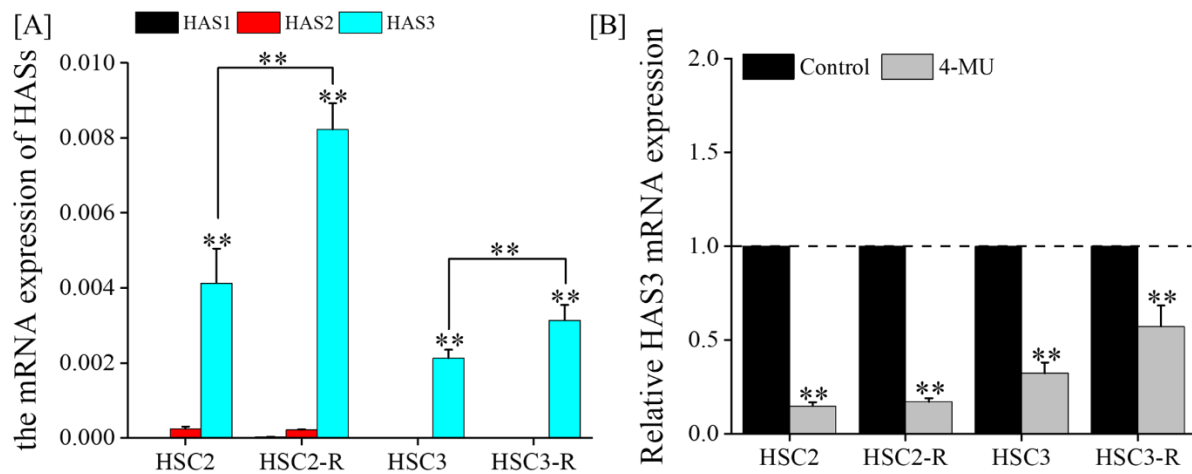

**Figure S1. The mRNA expression of HAS as measured by RT-qPCR.** A) mRNA expression of HAS in each cell line. (B) Relative mRNA expression of HAS3 treated with 500  $\mu$ M 4-MU. \*\* indicates  $P < 0.01$  vs. control.
